# Supplementary material
Source: PubMed Central journal article supplement (PMC3031448)
Supplement: NIHMS239789-supplement-Supplementary.pdf [file NIHMS239789-supplement-Supplementary.pdf]

Supplementary Material for:

**Isolation, Synthesis and Biological Activity of Aphrocallistin, an Adenine Substituted**

**Bromotyramine metabolite from the Hexactinellida Sponge *Aphrocallistes beatrix***

Amy E. Wright<sup>\*†</sup>, Gregory P. Roth<sup>†\*</sup>, Jennifer K. Hoffman<sup>†</sup>, Daniela B. Divlianska<sup>†</sup>, Diana Pechter<sup>†</sup>, Susan H. Sennett<sup>†</sup>, Esther A. Guzmán<sup>†</sup>, Patricia Linley<sup>†</sup>, Peter J. McCarthy<sup>†</sup>, Tara P. Pitts<sup>†</sup>, Shirley A. Pomponi<sup>†</sup> and John K. Reed<sup>†</sup>

*Center for Marine Biomedical and Biotechnology Research, Harbor Branch Oceanographic Institute at Florida Atlantic University, 5600 US 1 North, Ft. Pierce, Florida 34946 and Burnham Institute for Medical Research at Lake Nona, Burnham Center for Chemical Genomics, 6400 Sanger Road, Orlando, FL 32827*

Corresponding Authors:

Isolation, tumor biology: Wright: Tel: 772-465-2400 x 459; FAX: 772-461-2221; E-mail: awrigh33@fau.edu

Synthesis, Pharmacology: Roth Tel: 407-745-2062; FAX: 407-745-2001; E-mail: groth@burnham.org

- S.1 <sup>1</sup>H NMR Spectrum of Aphrocallistin (**1**). (600 MHz CD<sub>3</sub>OD).
- S.2 <sup>13</sup>C NMR Spectrum of Aphrocallistin (**1**) (600 MHz CD<sub>3</sub>OD).
- S.3 Expansion of HMBC Spectrum showing residual fully coupled <sup>1</sup>J<sub>CH</sub> for C-2' and C-8' (600 MHz CD<sub>3</sub>OD)
- S.4 Edited g-HSQC spectrum of Aphrocallistin (**1**) (600 MHz CD<sub>3</sub>OD).
- S.5 HMBC Spectrum of Aphrocallistin (**1**) (600 MHz CD<sub>3</sub>OD).
- S.6 Expansion of aliphatic region of g-DQF-COSY spectrum of aphrocallistin (**1**) (600 MHz CD<sub>3</sub>OD).
- S.7 g-NOESY Spectrum of Aphrocallistin (**1**) (600 MHz CD<sub>3</sub>OD).
- S.8 Expansion of g-NOESY spectrum of aphrocallistin (**1**) (600 MHz CD<sub>3</sub>OD).
- S.9 Expansion of g-NOESY spectrum of aphrocallistin (**1**) (600 MHz CD<sub>3</sub>OD).
- S.10 <sup>15</sup>N HMBC Spectrum of aphrocallistin (**1**), (600 MHz CD<sub>3</sub>OD).
- S.11 In Vitro Pharmacology data for Aphrocallistin (**1**)
- S.12 NCI 60 cell line panel data for Aphrocallistin (**1**)
- S.13 <sup>1</sup>H NMR of Synthetic Aphrocallistin (**1**) (400 MHz CD<sub>3</sub>OD)
- S.14 Expansion of <sup>1</sup>H NMR of Synthetic Aphrocallistin (**1**) (400 MHz CD<sub>3</sub>OD)
- S.15 LC-MS trace for Synthetic Aphrocallistin (**1**).
- S.16 Details of Preparation of N-(4-Methoxyphenethyl)acetamide (**6**)

S.1 <sup>1</sup>H NMR Spectrum of Aphrocallistin (1). (600 MHz CD<sub>3</sub>OD).

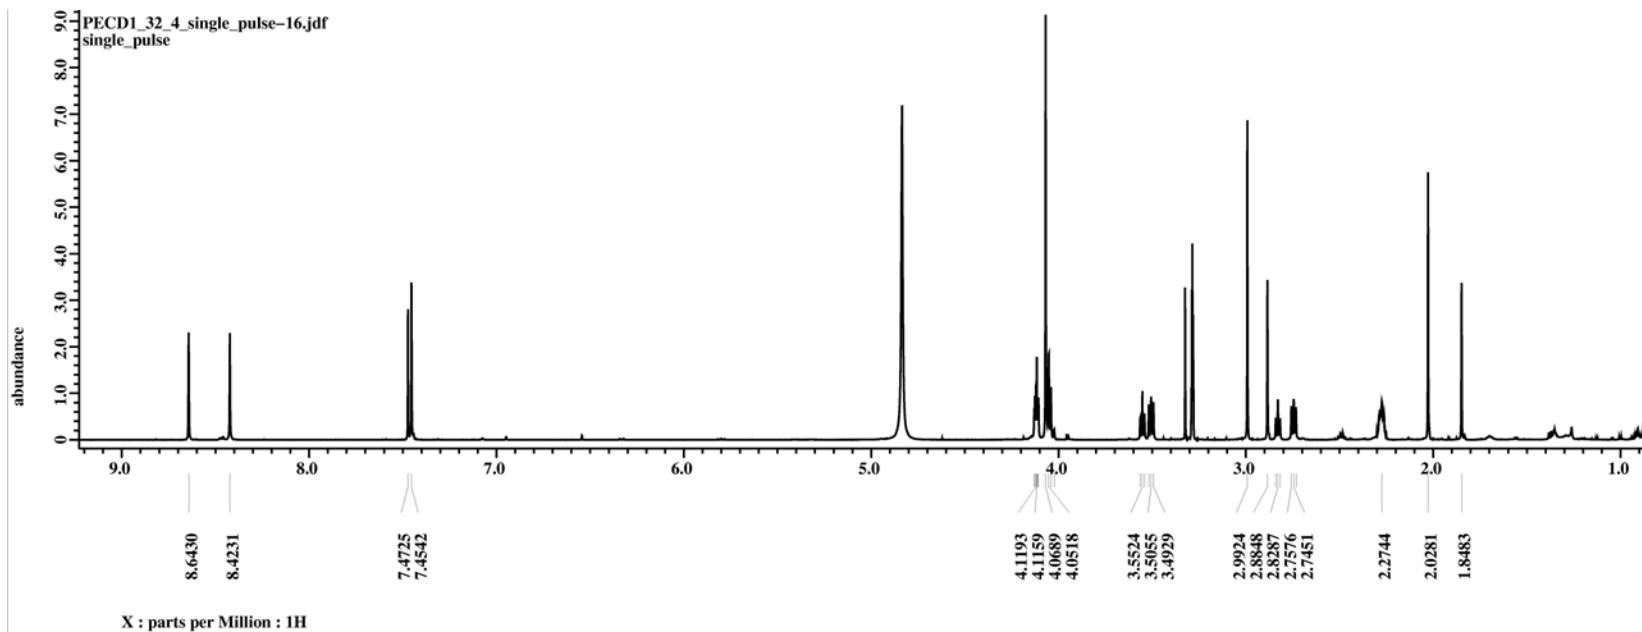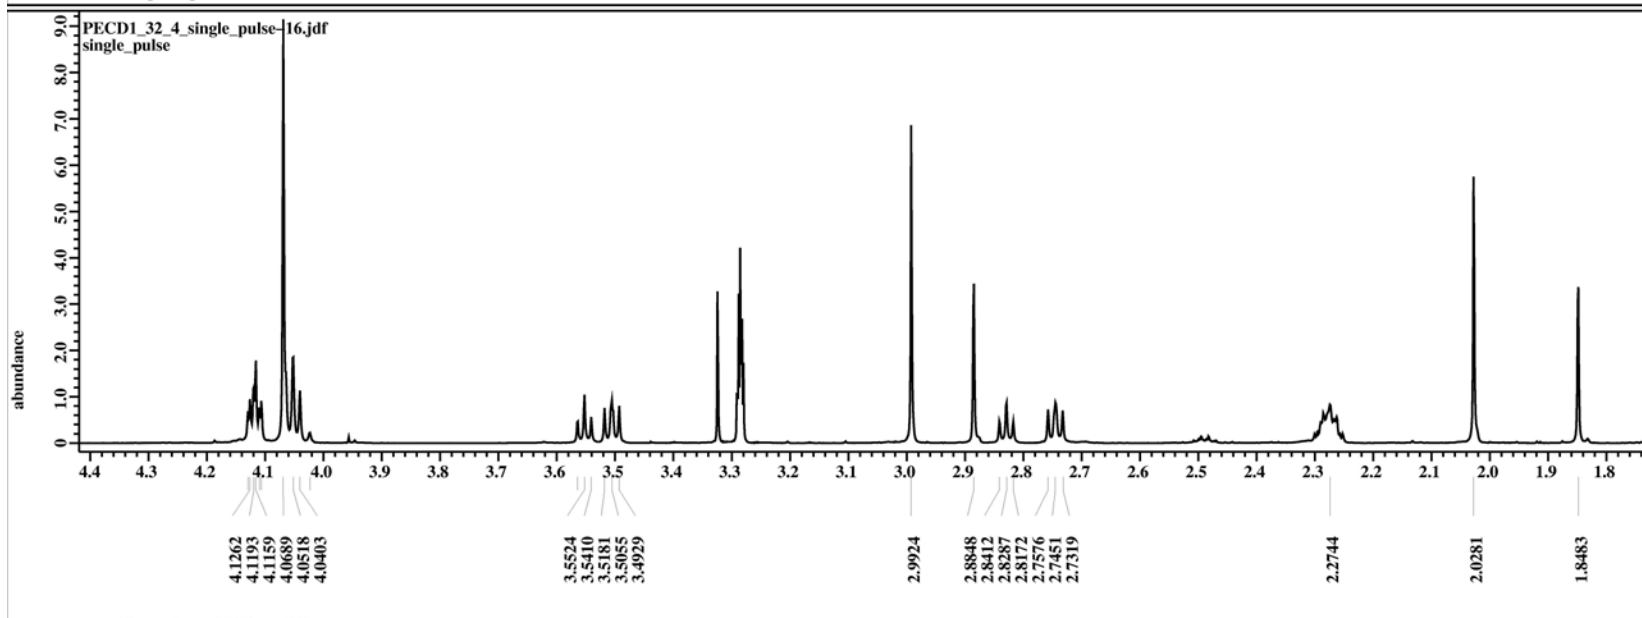

S2.  $^{13}\text{C}$  NMR Spectrum of Aphrocallistin (1). 600 MHz  $\text{CD}_3\text{OD}$

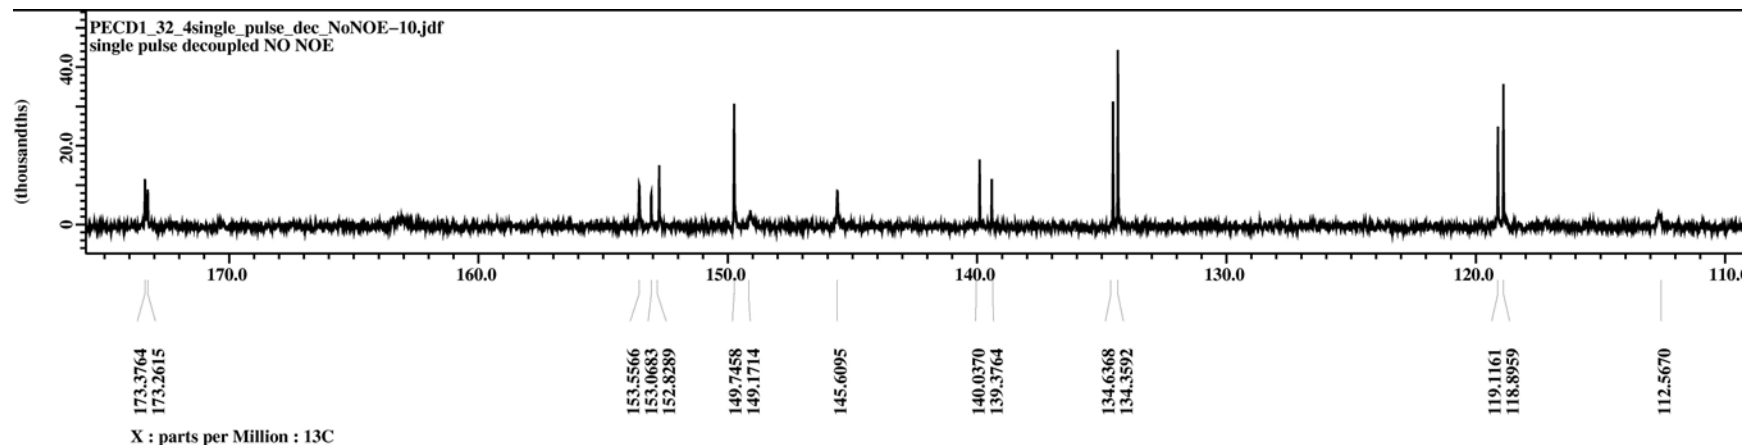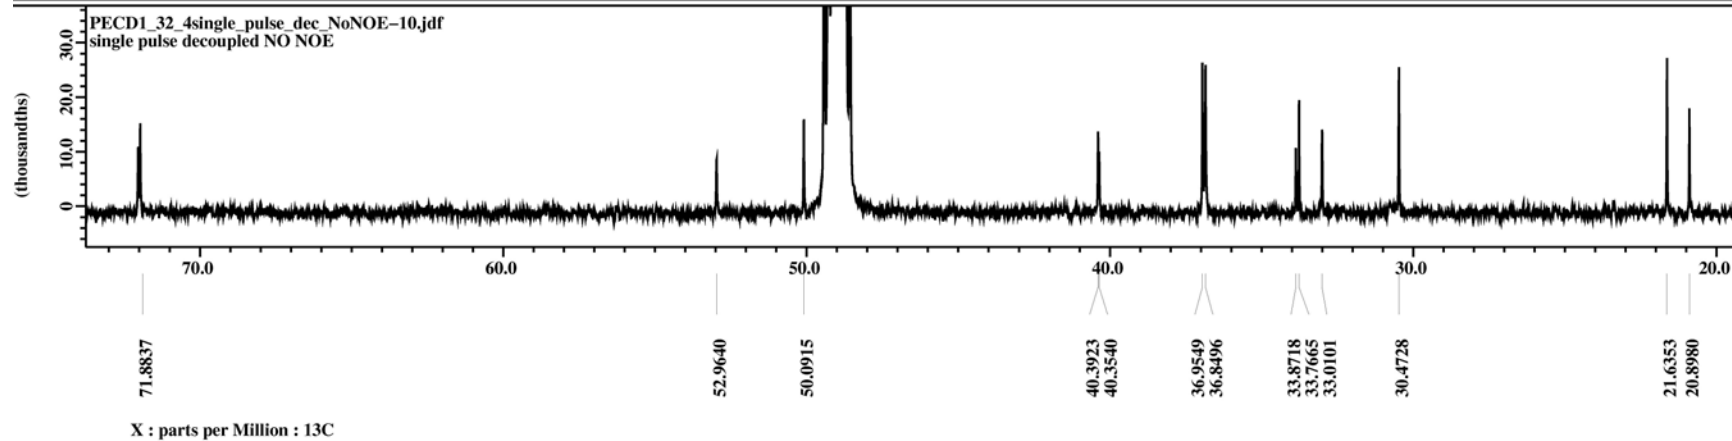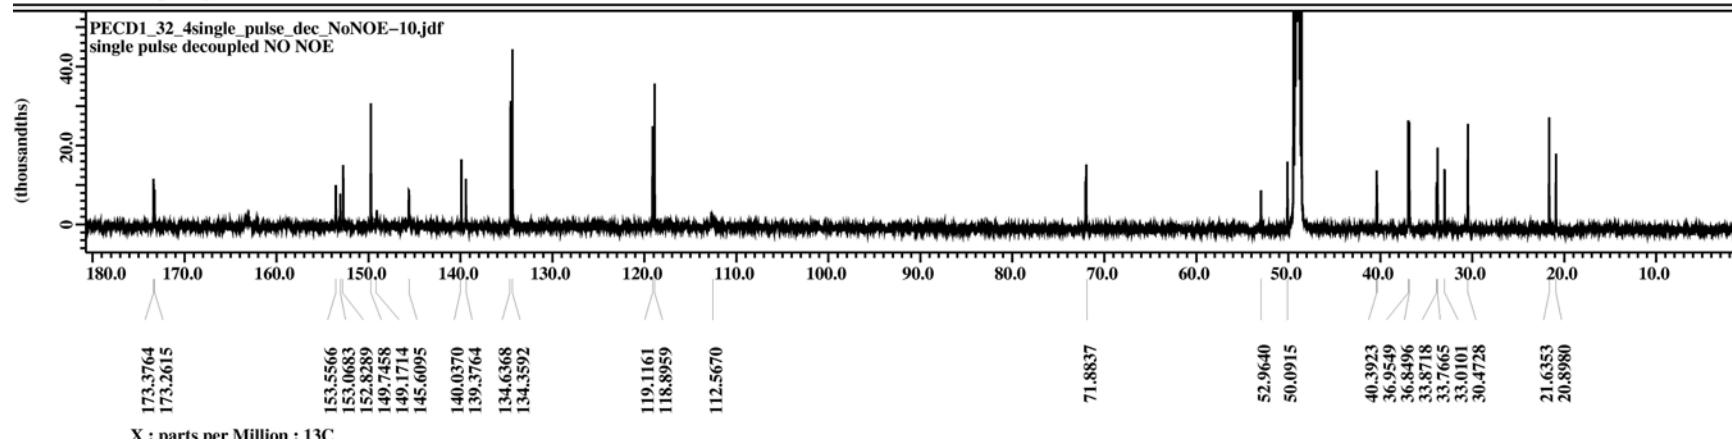

S3. Expansion of HMBC Spectrum showing residual fully coupled  $^1J_{CH}$  for Carbons 2' and 8'. 600 MHz CD<sub>3</sub>OD

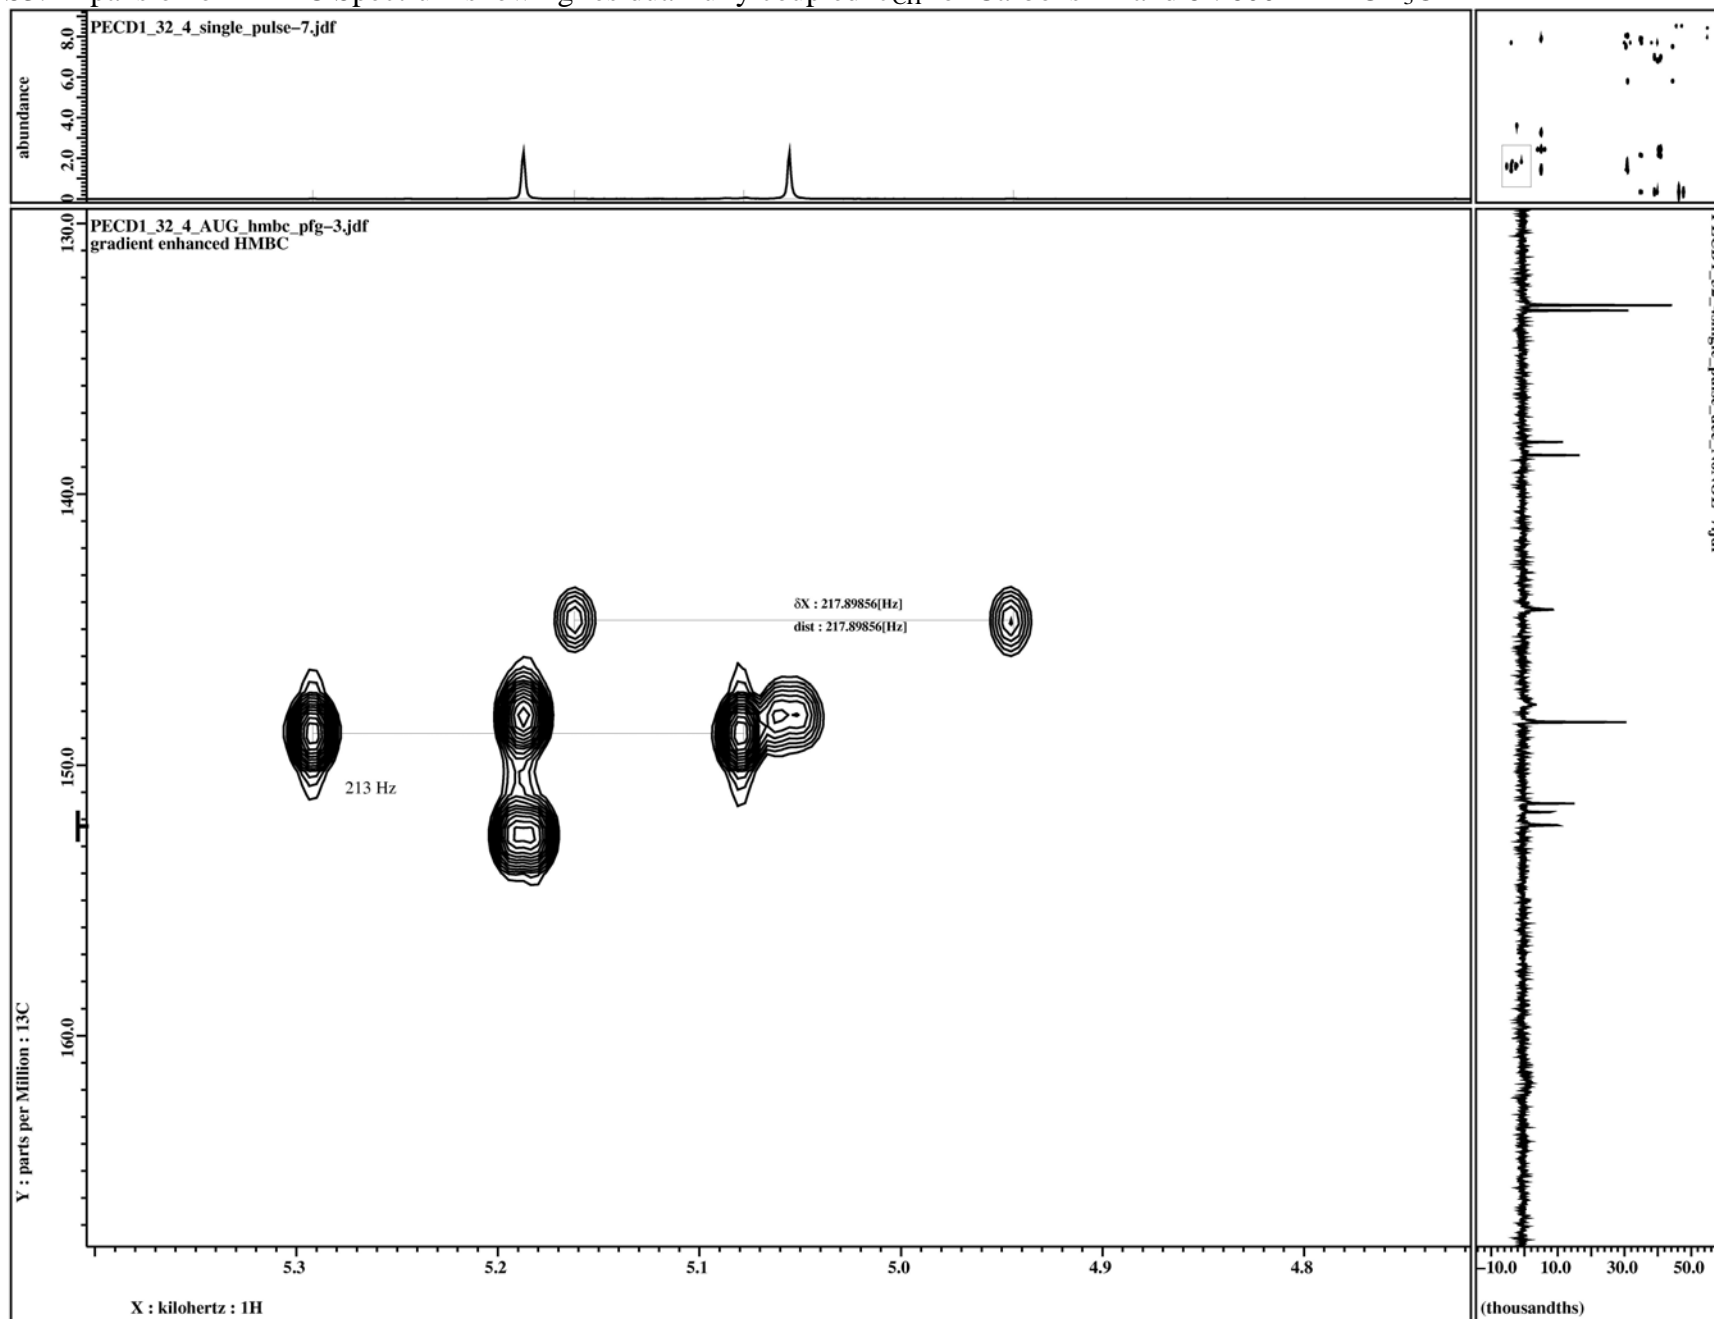

S4. Edited g-HSQC spectrum of Aphrocallistin (1). 600 MHz CD<sub>3</sub>OD

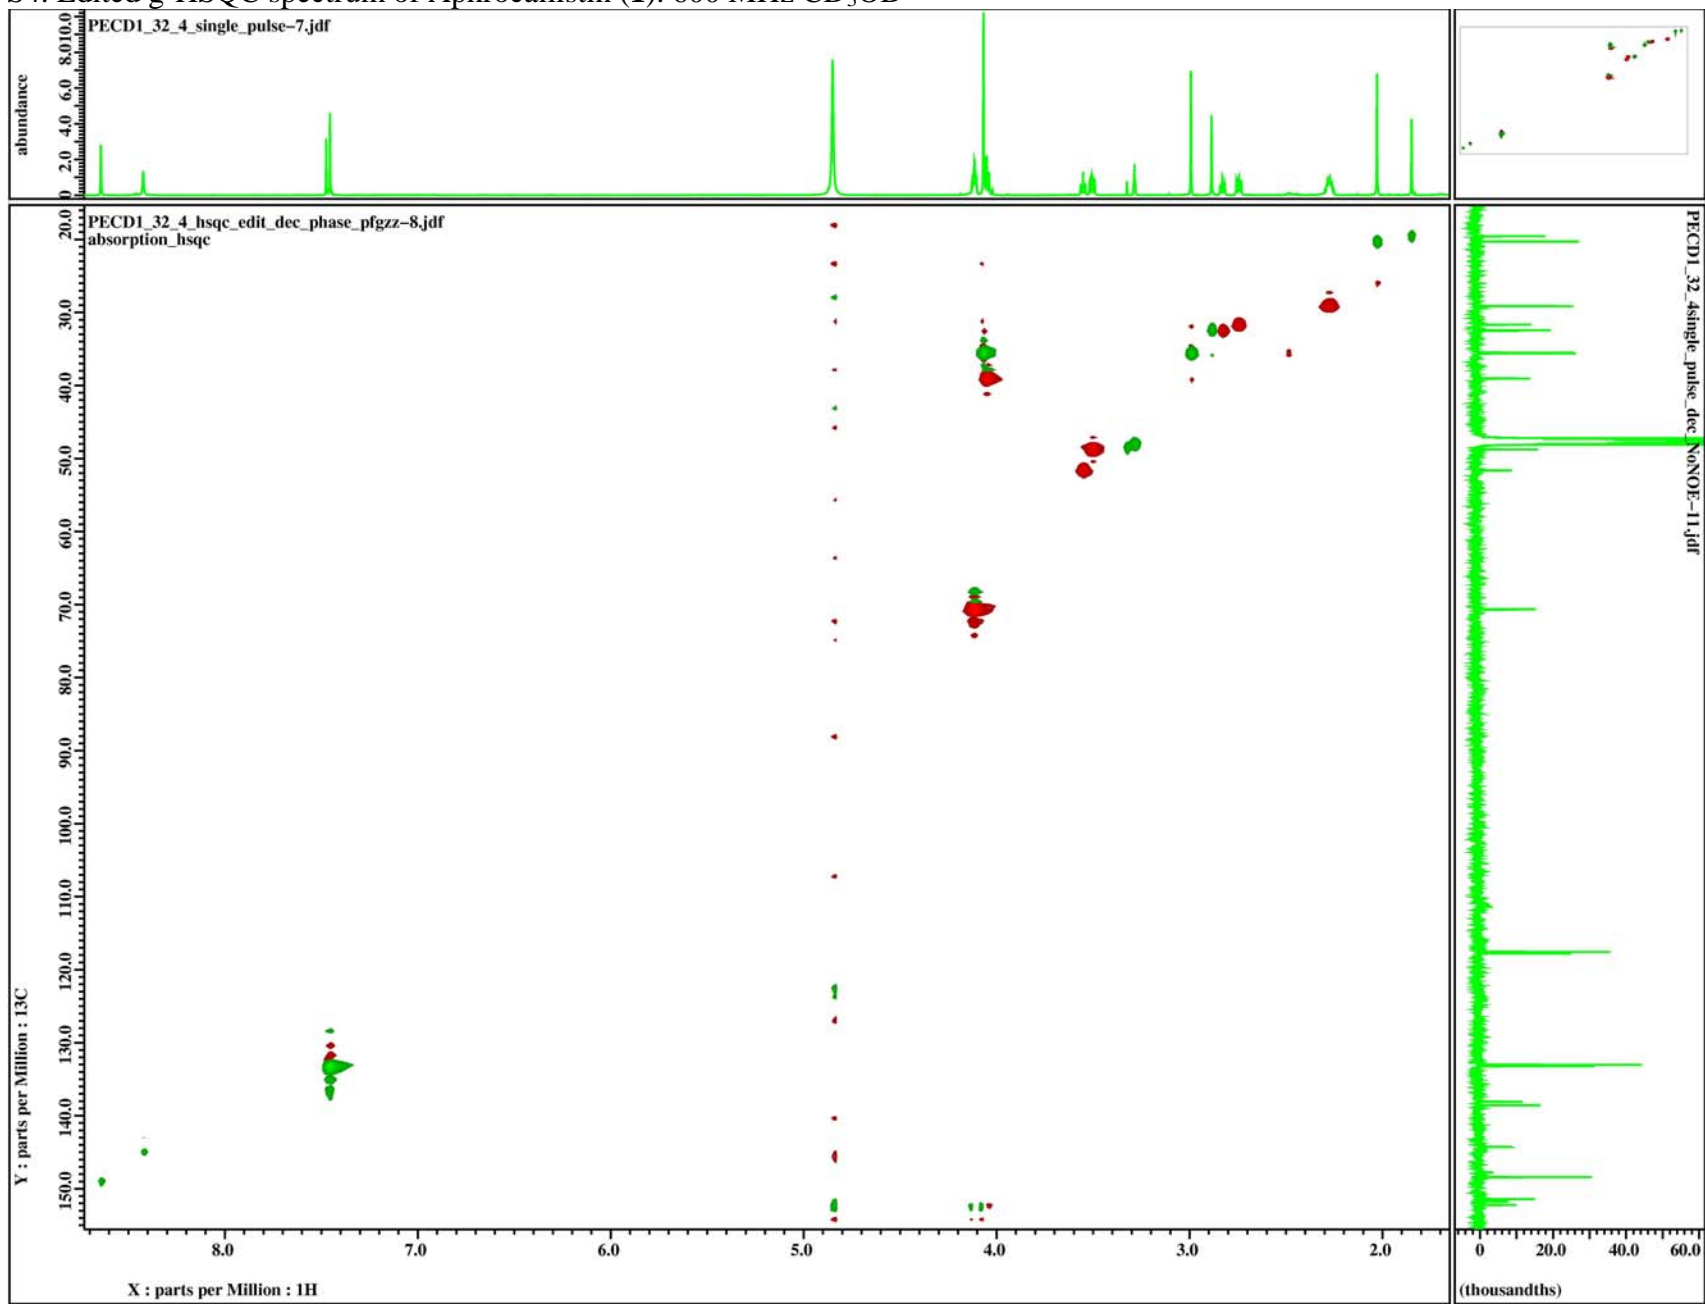

S5. HMBC Spectrum of Aphrocallistin (1),  $d_4$ -methanol

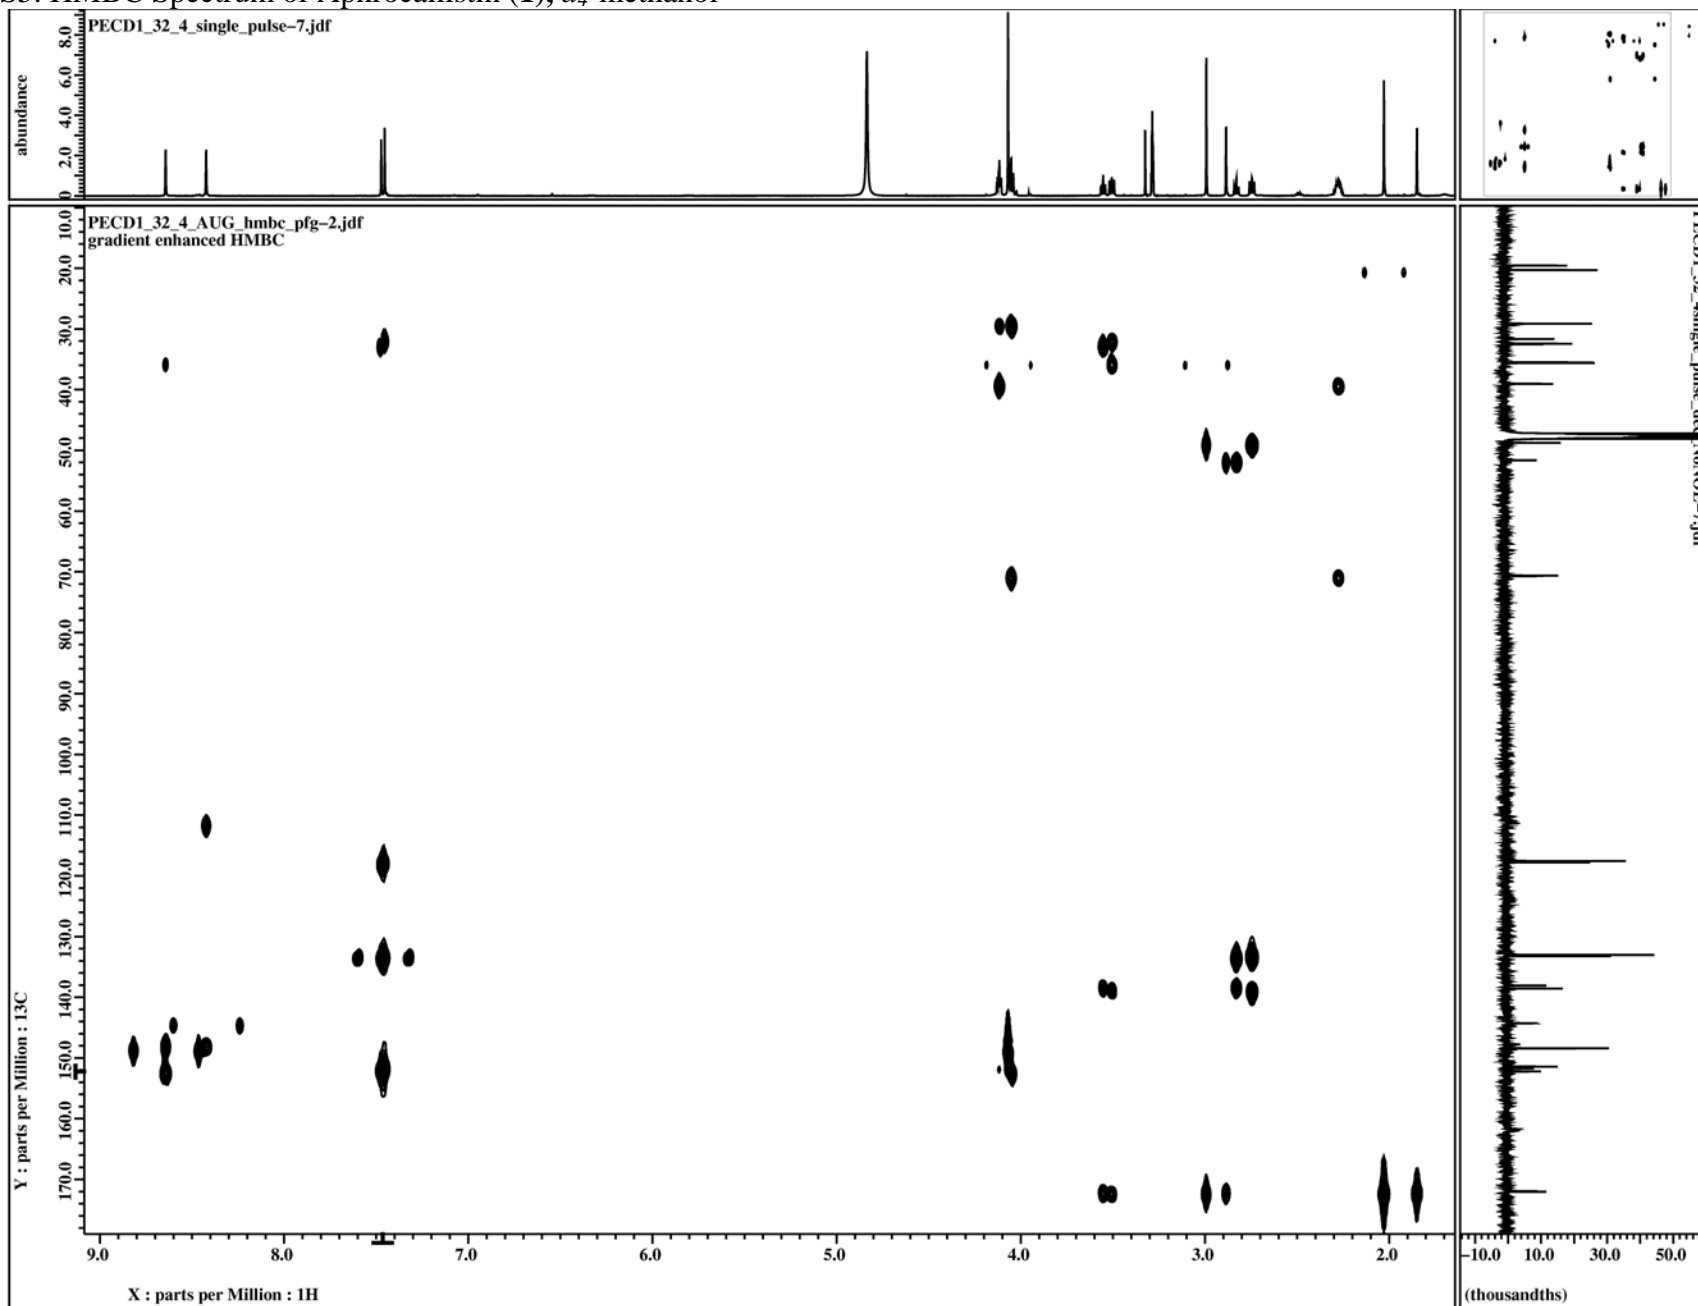

S6-Expansion of aliphatic region of g-DQF-COSY spectrum of aphrocallistin (1), *d*<sub>4</sub>-methanol

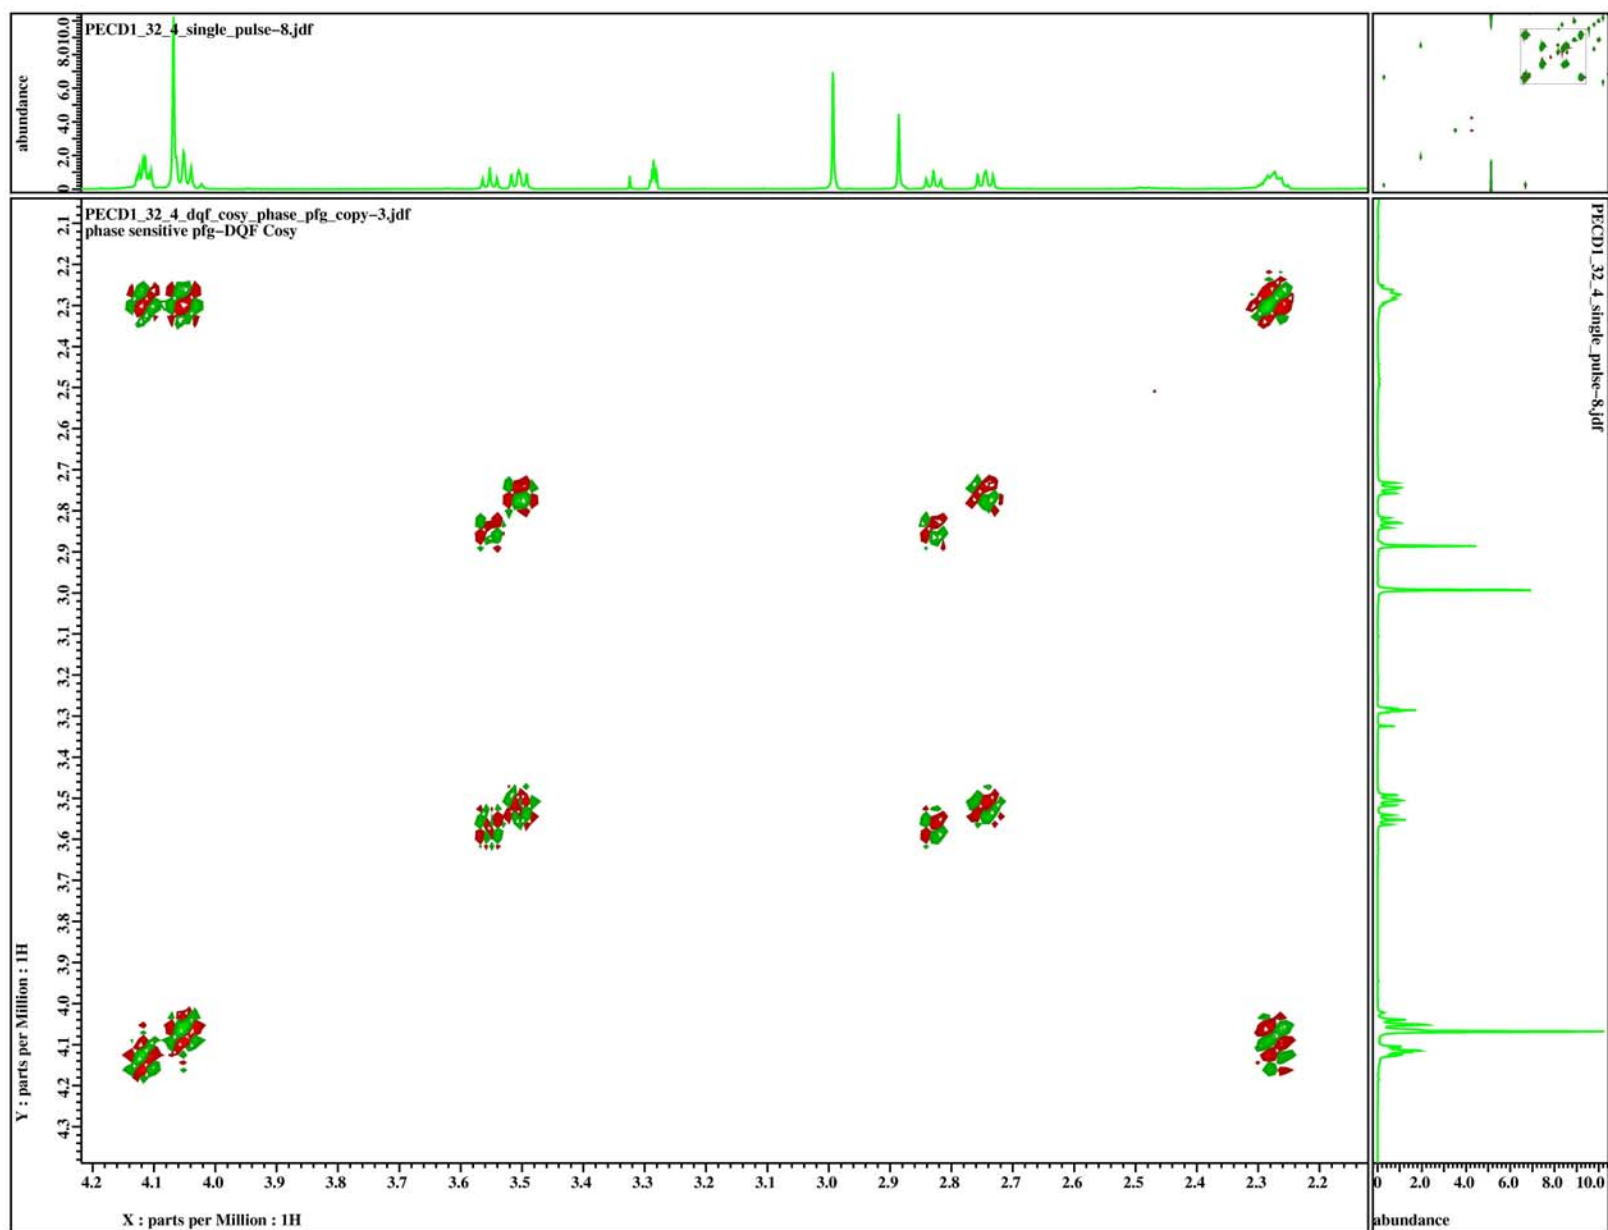

S7. g-NOESY Spectrum of Aphrocallistin (1), CD<sub>3</sub>OD

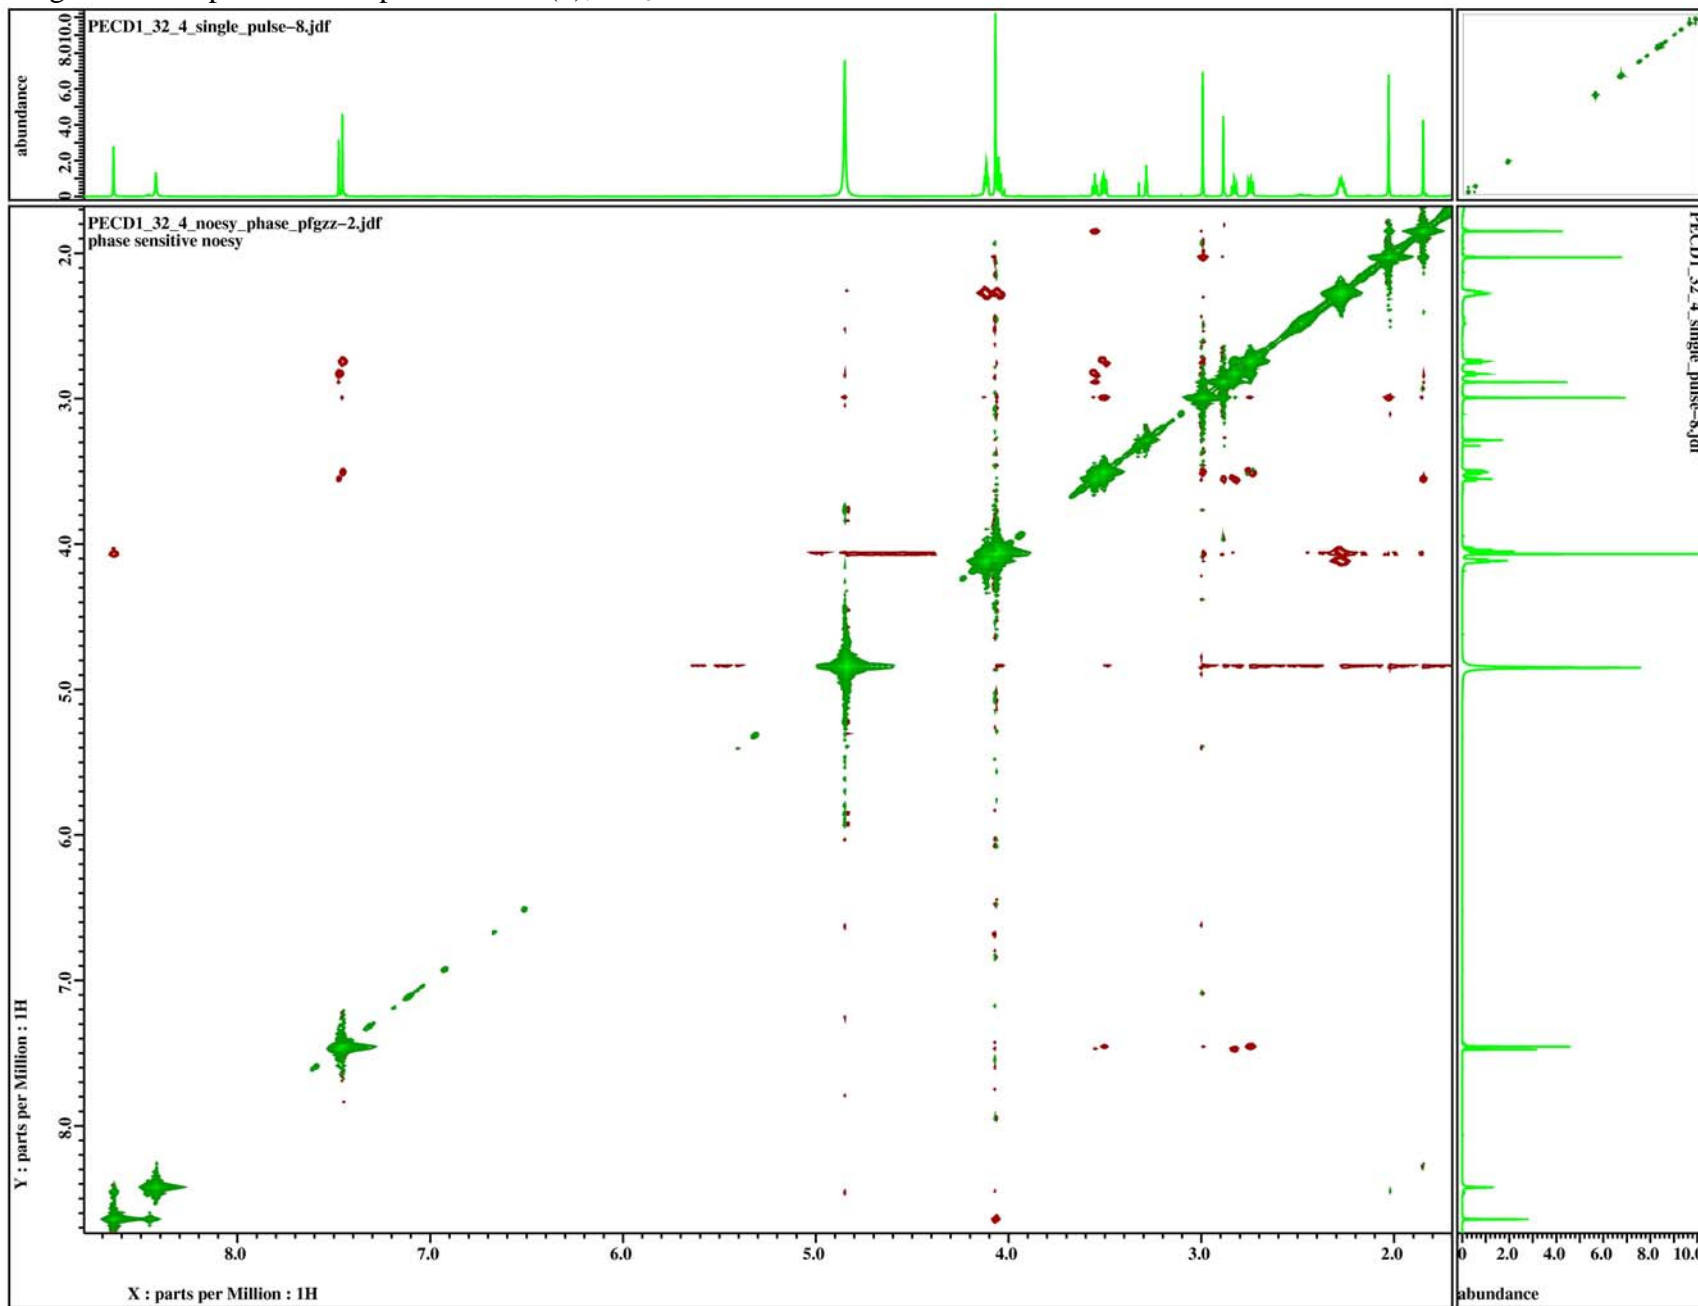



S8. Expansion of g-NOESY spectrum of aphrocallistin (1), CD<sub>3</sub>OD

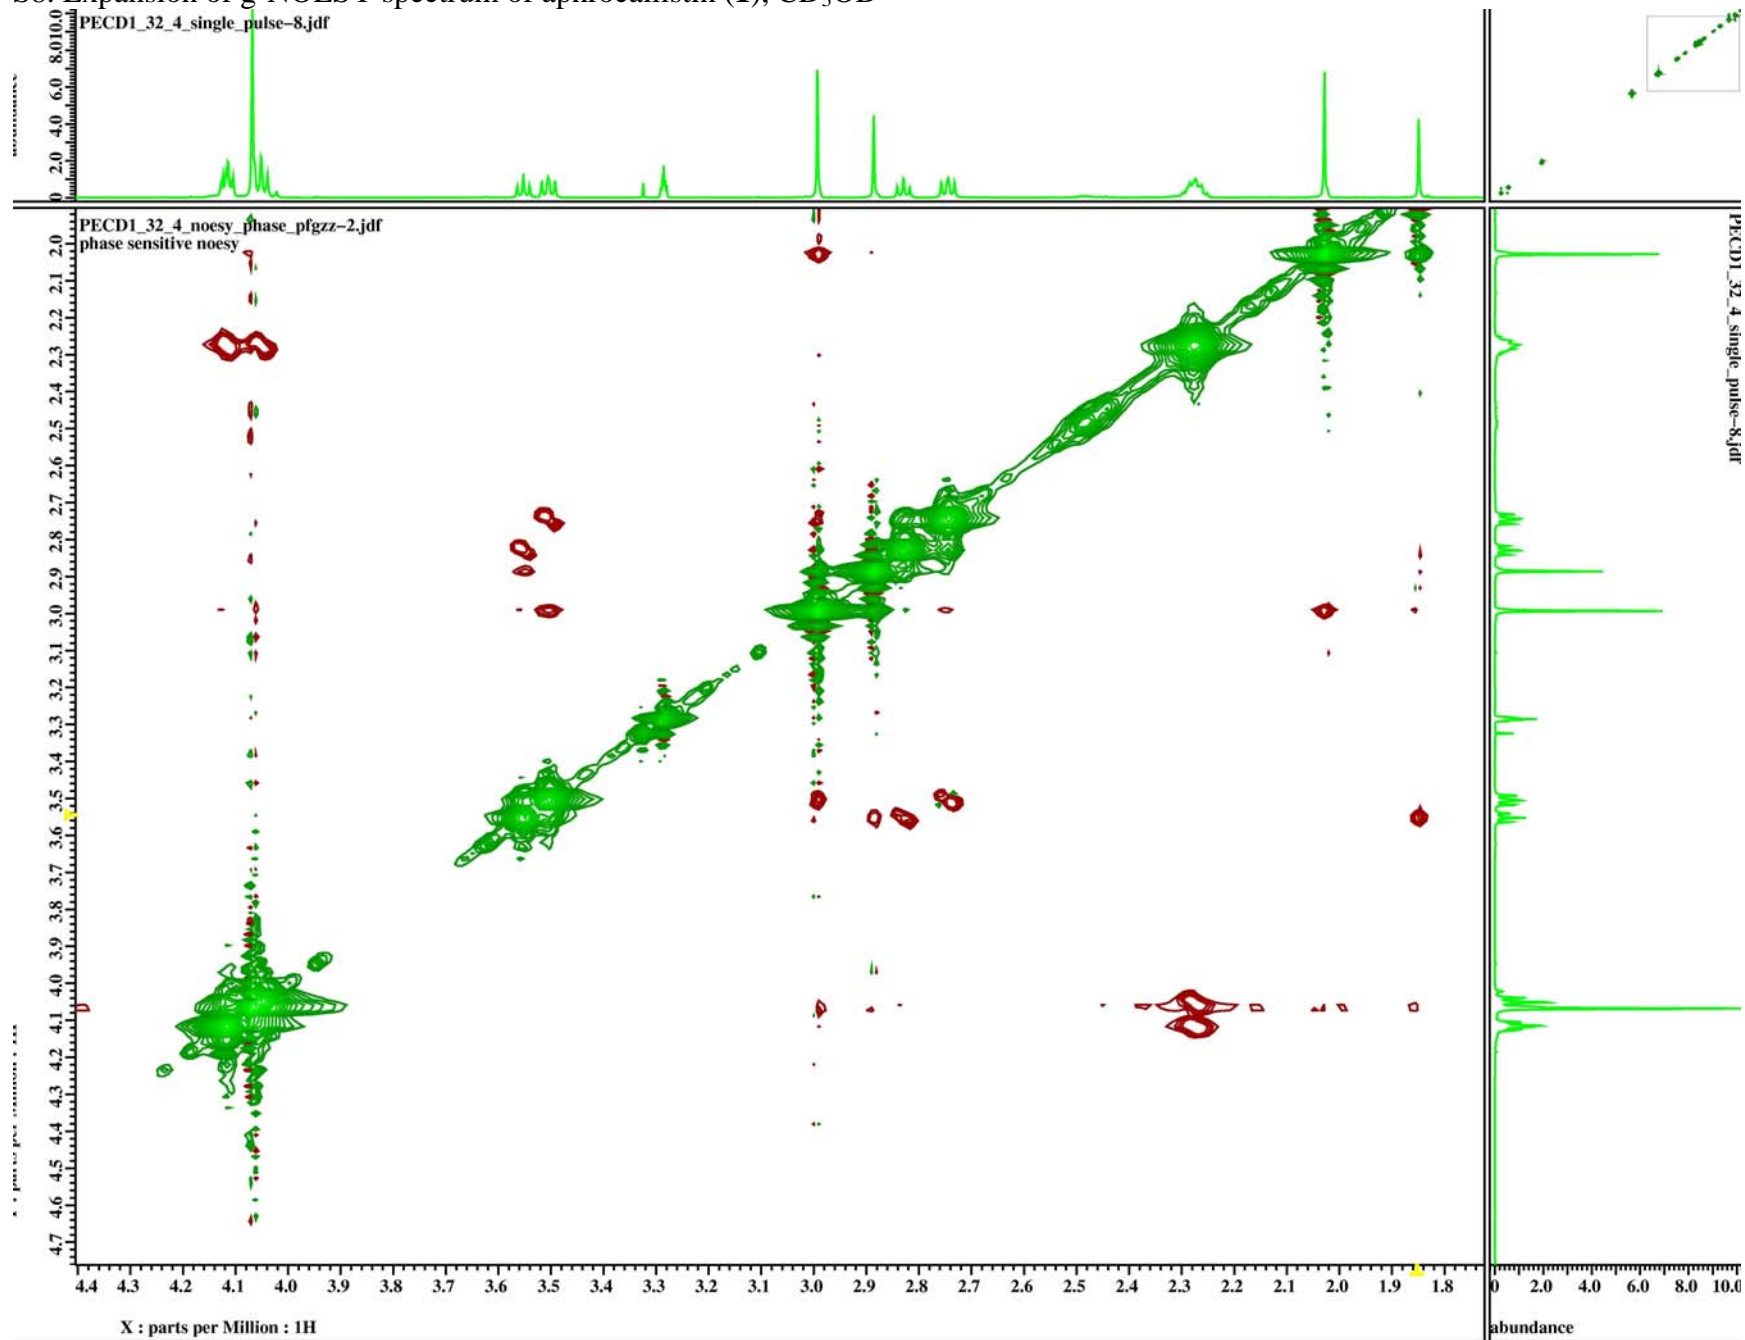

S9. Expansion of g-NOESY spectrum of aphrocallistin (1), CD<sub>3</sub>OD

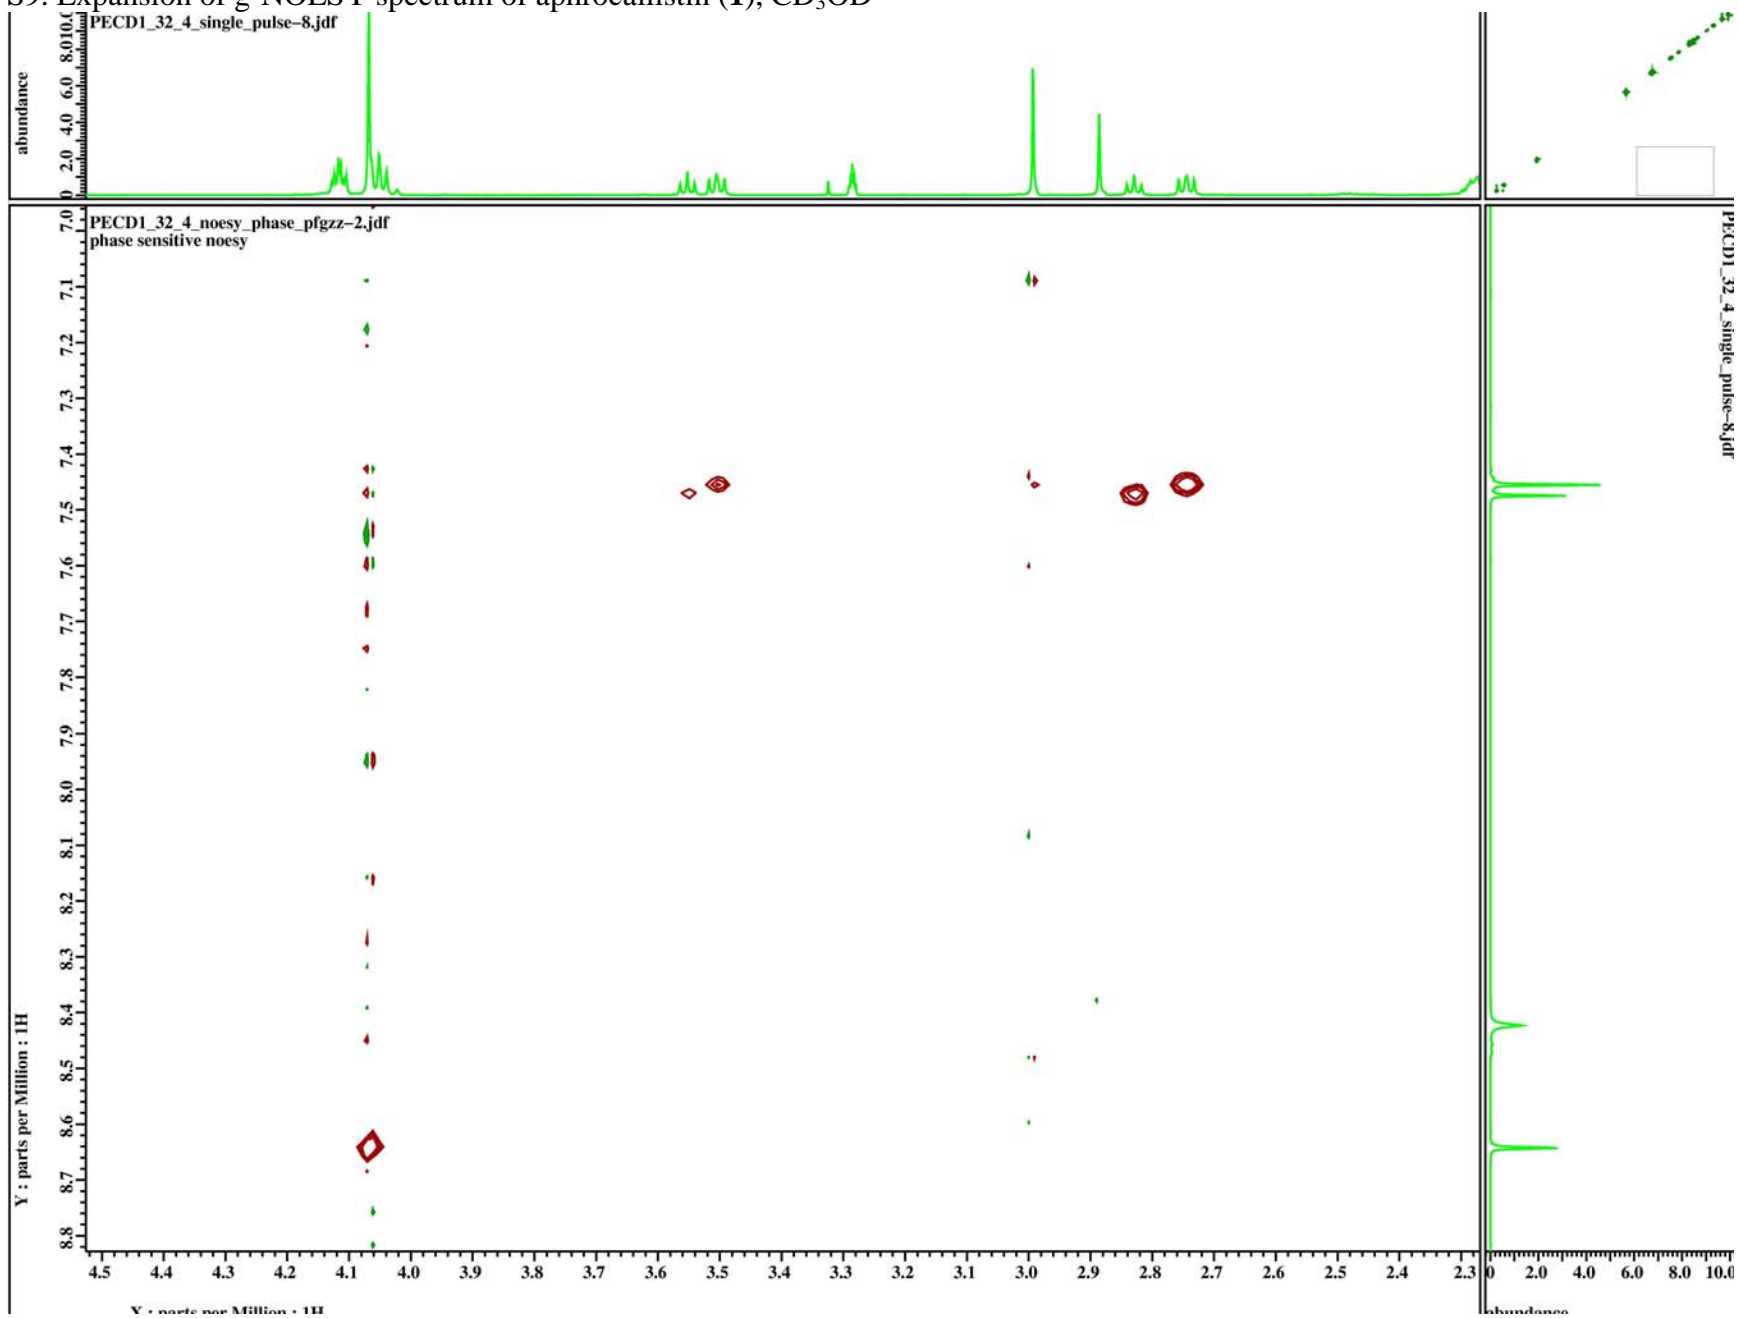

S10.  $^{15}\text{N}$  HMBC Spectrum of aphrocallistin (1),  $\text{CD}_3\text{OD}$

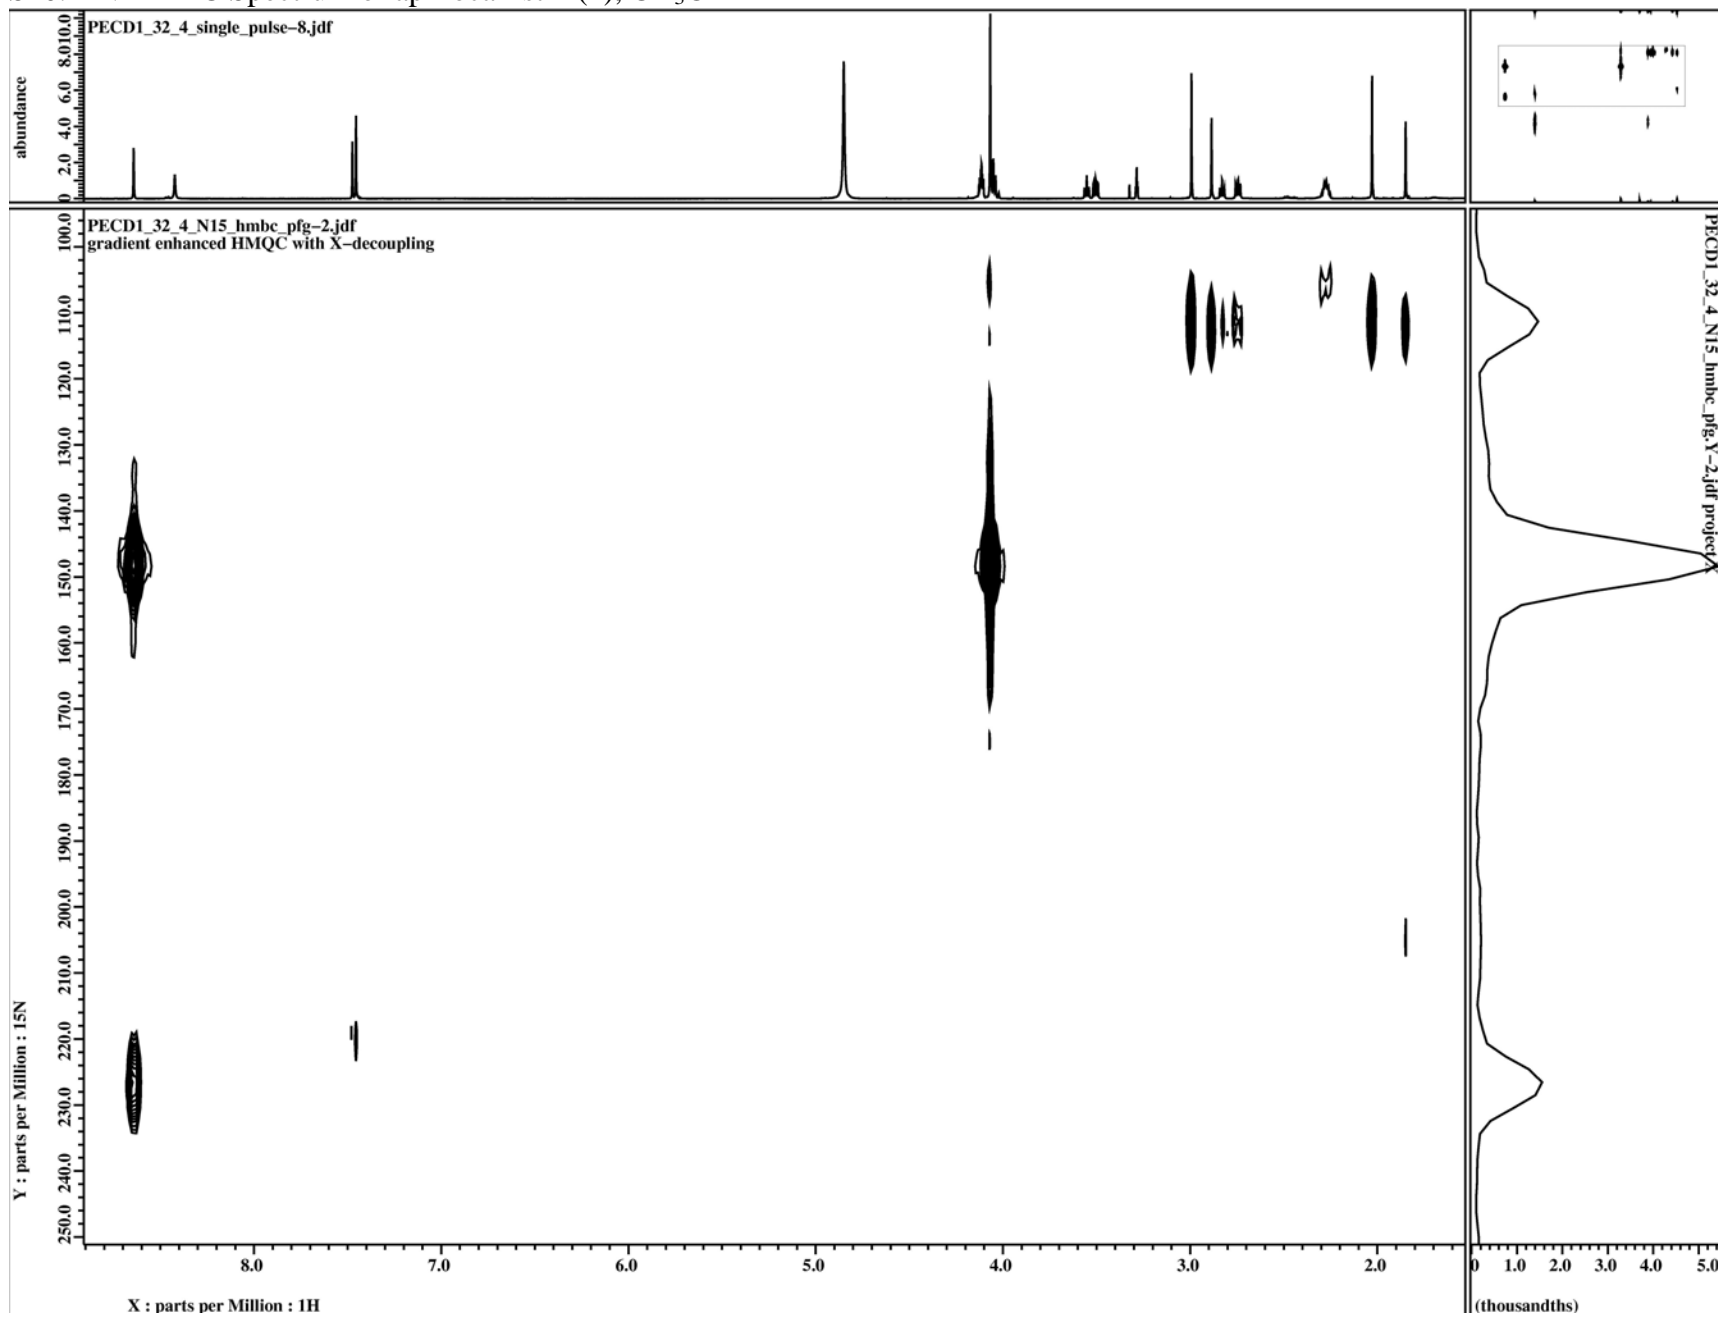



### S.11 In Vitro Pharmacology of Aphrocallistin

The pharmacological properties of aphrocallistin were evaluated in various *in vitro* assays (Table S2). The solubility of the compound was assessed to be high at three pH levels (Table S2A). It exhibited moderate permeability at pH 6.2 and 7.4 and poor-to-moderate permeability at pH 5.0 (Table S2B). Aphrocallistin showed extensive protein binding at both test concentrations in human plasma – 95.6% at 1  $\mu$ M and 89.7% at 10  $\mu$ M. In mouse plasma, high protein binding was observed at 1  $\mu$ M (85.0% bound) and moderate at 10  $\mu$ M (69.1% bound) (Table S2C). Aphrocallistin was observed to remain stable in both human and mouse plasma at t=3.0 hours and in PBS (Table S2D). However, it was metabolized 96.92% and 98.56% in human and mouse liver microsomes, respectively, which suggests that aphrocallistin will be a subject to significant hepatic metabolism *in vivo* (Table S2E).

Table S2 *In vitro* pharmacology data for aphrocallistin (1).

#### S2A. Solubility.

| pH                     | 5.0  | 6.2  | 7.4  |
|------------------------|------|------|------|
| Avg. Sol ( $\mu$ g/mL) | >267 | >267 | >267 |
| Limit ( $\mu$ g/mL)    | 267  | 267  | 267  |

#### S2B. Permeability.

| Permeability of Compound at 50 $\mu$ M | pH  | Avg. $P_e$ ( $\times 10^{-6}$ cm/s) | SD $P_e$ | -log $P_e$ |
|----------------------------------------|-----|-------------------------------------|----------|------------|
| Poor to moderate                       | 5.0 | 33                                  | 2        | 4.5        |
| Moderate                               | 6.3 | 201                                 | 2        | 3.7        |
| Moderate                               | 7.4 | 321                                 | 29       | 3.5        |

#### S2C. Plasma Protein Binding.

| Plasma Protein Binding (Test Concentration, $\mu$ M) |                       | % Free | % Bound |
|------------------------------------------------------|-----------------------|--------|---------|
| Human                                                | Strong (10 $\mu$ M)   | 10.3   | 89.7    |
|                                                      | Strong (1 $\mu$ M)    | 4.4    | 95.6    |
| Mouse                                                | Moderate (10 $\mu$ M) | 30.9   | 69.1    |
|                                                      | Strong (1 $\mu$ M)    | 15.0   | 85.0    |

#### S2D. Plasma Stability.

| Test Compound at 40 $\mu$ M | Plasma/PBS % Remaining |       | Plasma/PBS/PI % Remaining |       | PBS/PI % Remaining |       | PBS % Remaining |       |
|-----------------------------|------------------------|-------|---------------------------|-------|--------------------|-------|-----------------|-------|
|                             | Human                  | Mouse | Human                     | Mouse | Human              | Mouse | Human           | Mouse |
| Plasma Stability            | 103.1                  | 96.3  | 76.6                      | 79.6  | 76.5               | 85.8  | 103.8           | 99.7  |

#### S2E. Microsomal Stability.

| <b>Microsomal Stability</b> | <b>Final Assay Concentration</b> | <b>NADPH</b> | <b>% Remaining at 60 min</b> | <b>% Metabolized</b> |
|-----------------------------|----------------------------------|--------------|------------------------------|----------------------|
| Human Liver Microsomes      | 1 $\mu$ M                        | +            | 3.08                         | 96.92                |
| Human Liver Microsomes      | 1 $\mu$ M                        | -            | 117.73                       |                      |
| Mouse Liver Microsomes      | 1 $\mu$ M                        | +            | 1.44                         | 98.56                |
| Mouse Liver Microsomes      | 1 $\mu$ M                        | -            | 103.32                       |                      |

S12. NCI 60 cell line panel data for Aphrocallistin

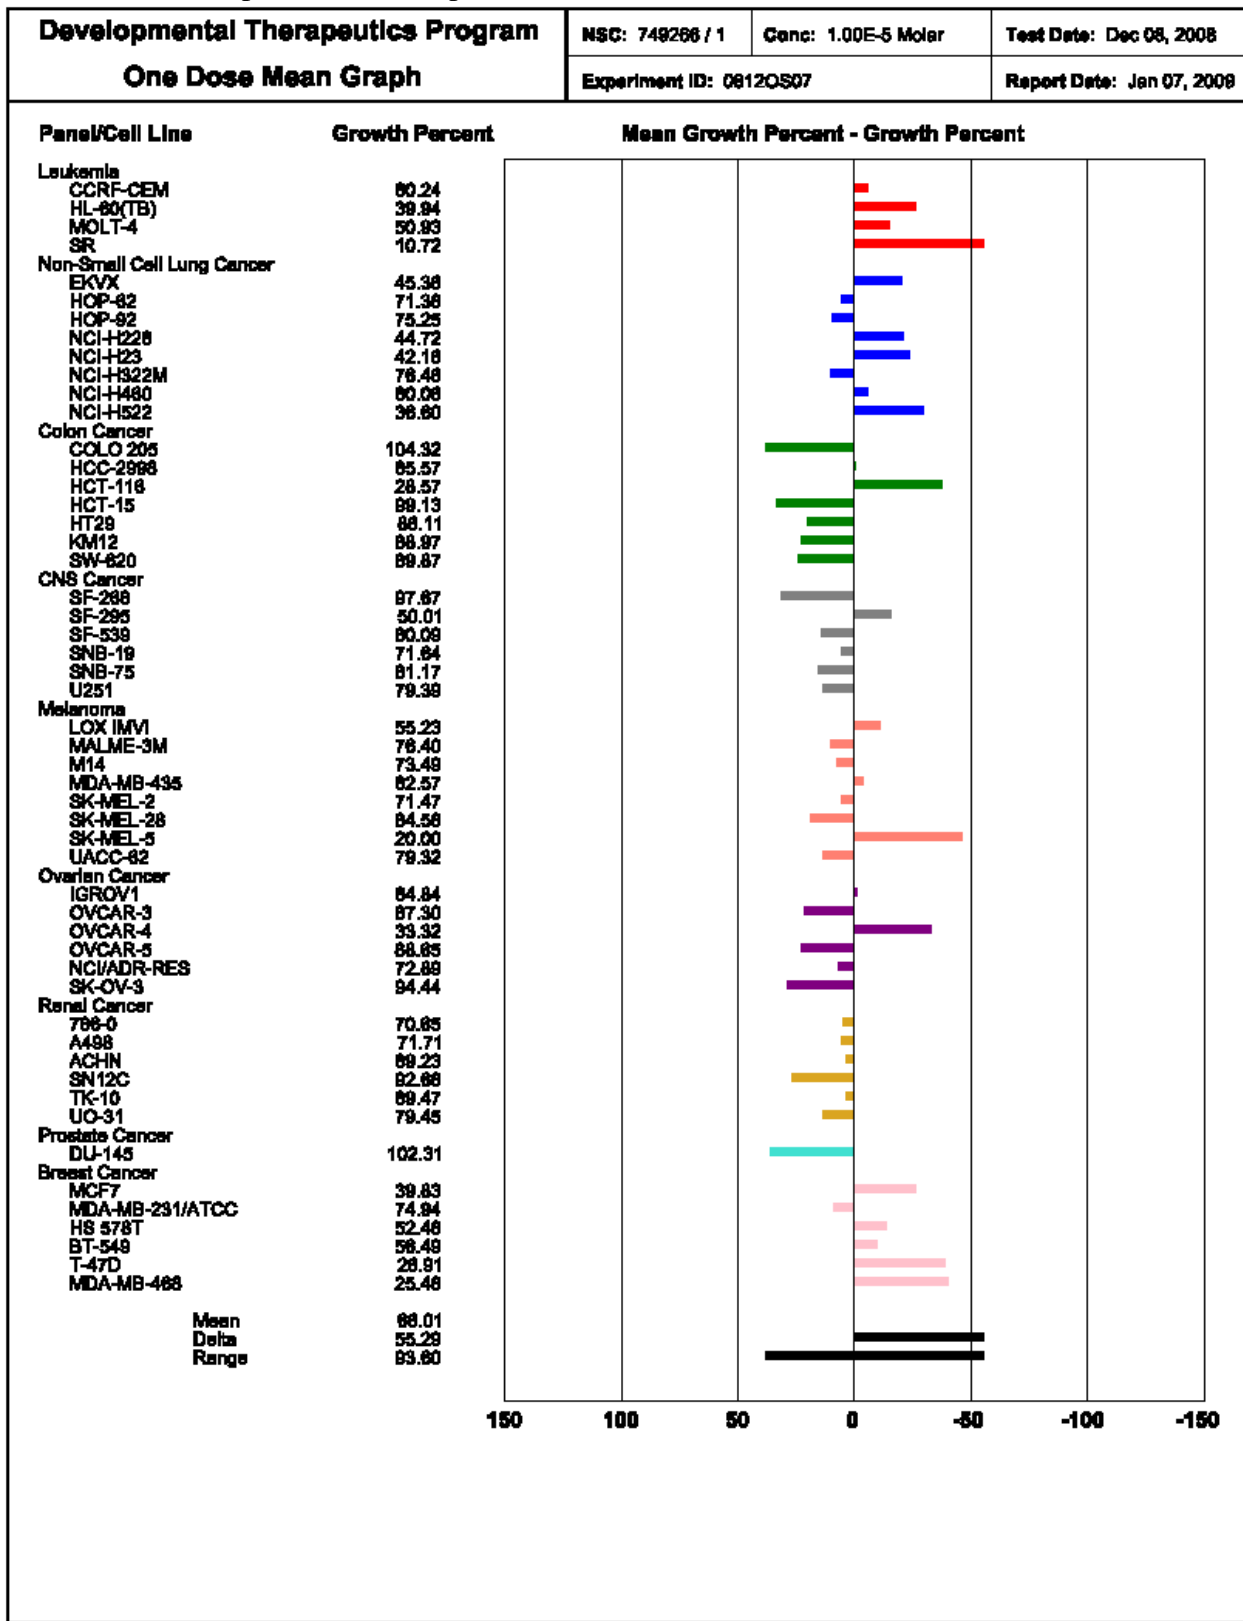

(1)

S13. <sup>1</sup>H NMR of Synthetic Aphrocallistin (1) (400 MHz CD<sub>3</sub>OD)

Aphrocallistin 9-19

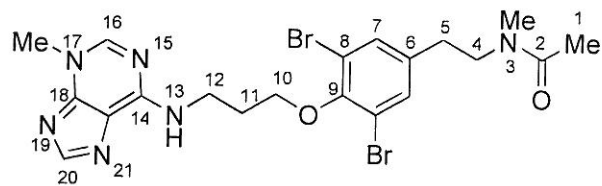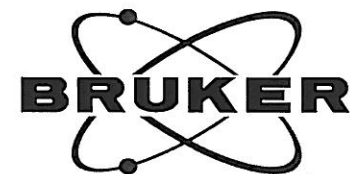

NAME Sep19-2008-jkh  
 EXPNO 10  
 PROCNO 1  
 Date\_ 20080919  
 Time 14.01  
 INSTRUM spect  
 PROBHD 5 mm QNP 1H/15  
 PULPROG zg30  
 TD 65536  
 SOLVENT MeOD  
 NS 64  
 DS 2  
 SWH 8278.146 Hz  
 FIDRES 0.126314 Hz  
 AQ 3.9584243 sec  
 RG 362  
 DW 60.400 usec  
 DE 6.50 usec  
 TE 293.5 K  
 D1 1.00000000 sec  
 TD0 1

----- CHANNEL f1 -----  
 NUC1 1H  
 P1 10.12 usec  
 PL1 -4.00 dB  
 SFO1 400.1324710 MHz  
 SI 32768  
 SF 400.1300477 MHz  
 WDW EM  
 SSB 0  
 LB 0.30 Hz  
 GB 0  
 PC 1.00

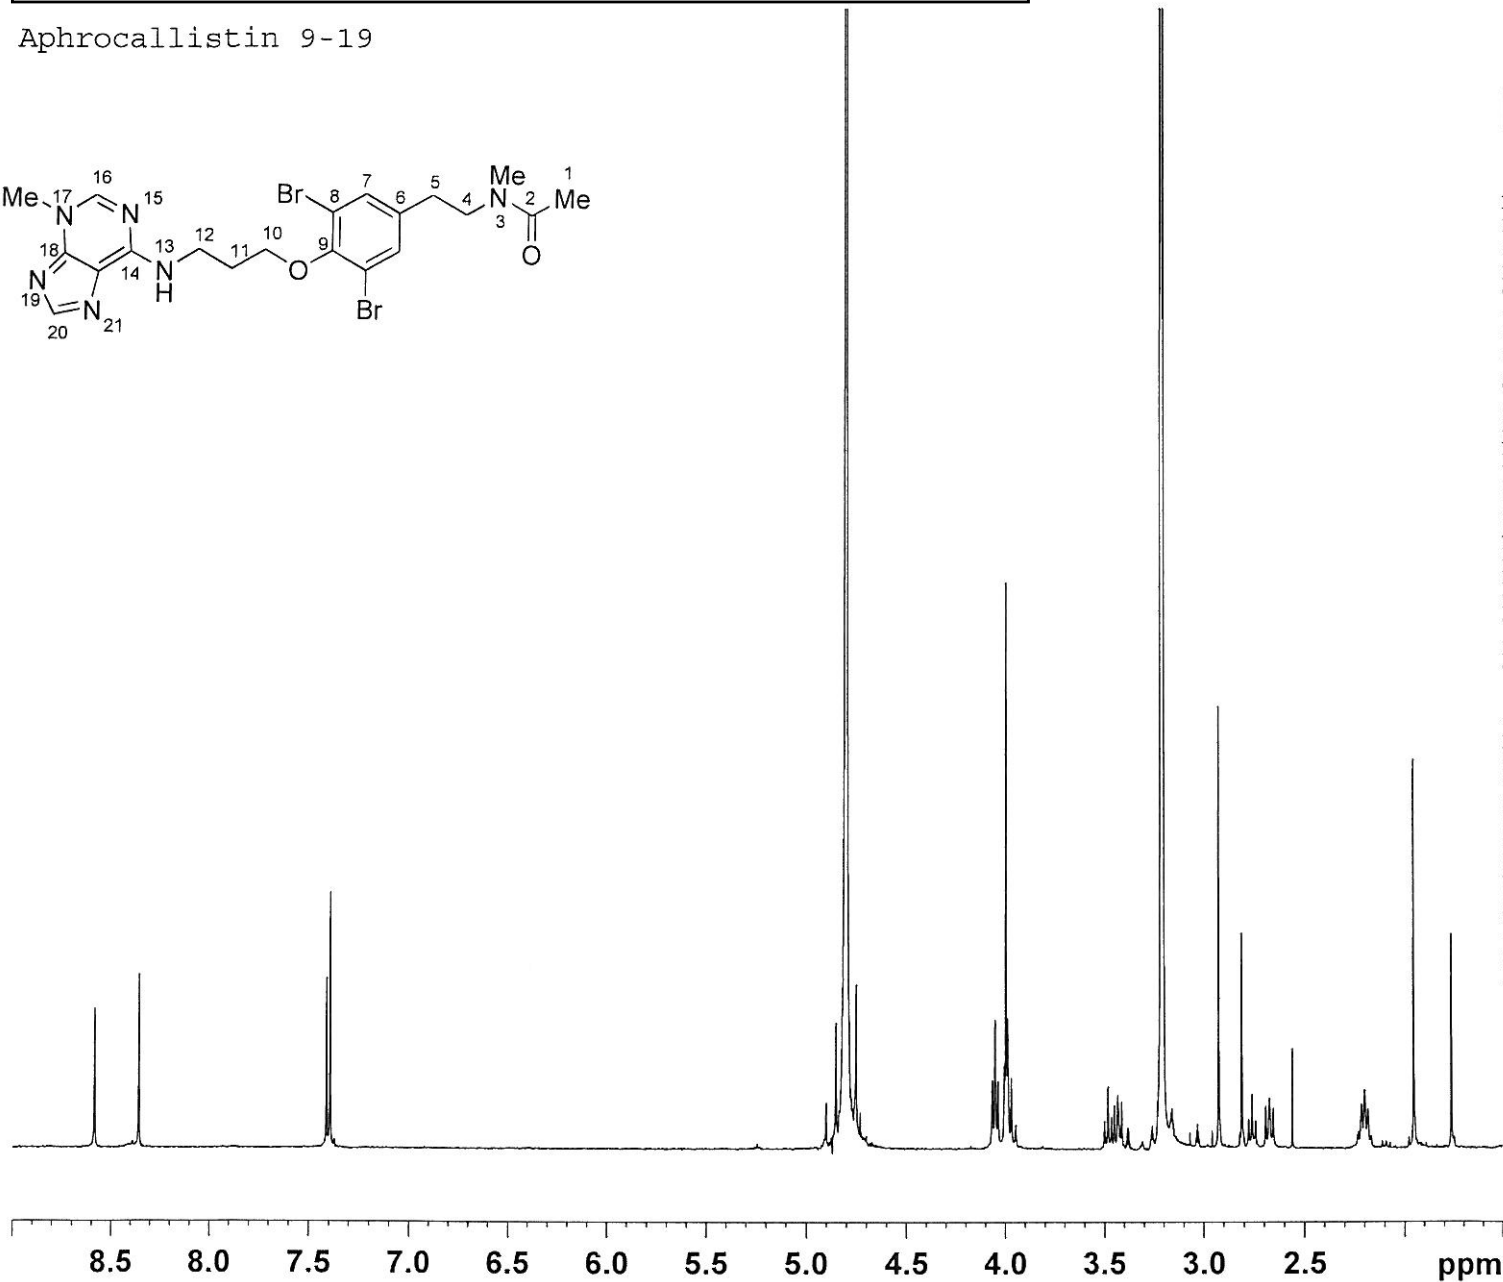



S14. Expansion of <sup>1</sup>H NMR of Synthetic Aphrocallistin (1) (400 MHz CD<sub>3</sub>OD)

Aphrocallistin 9-19

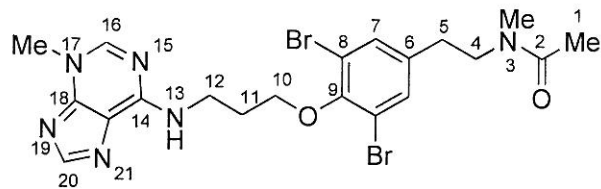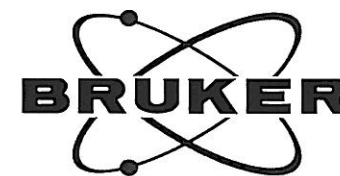

```

NAME      Sep19-2008-jkh
EXPNO     10
PROCNO    1
Date_     20080919
Time      14.01
INSTRUM   spect
PROBHD    5 mm QNP 1H/15
PULPROG   zg30
TD         65536
SOLVENT   MeOD
NS         64
DS         2
SWH       8278.146 Hz
FIDRES    0.126314 Hz
AQ         3.9584243 sec
RG         362
DW         60.400 usec
DE         6.50 usec
TE         293.5 K
D1         1.00000000 sec
TD0        1
  
```

```

===== CHANNEL f1 =====
NUC1      1H
P1        10.12 usec
PL1       -4.00 dB
SFO1     400.1324710 MHz
SI        32768
SF        400.1300477 MHz
WDW       EM
SSB       0
LB        0.30 Hz
GB        0
PC        1.00
  
```

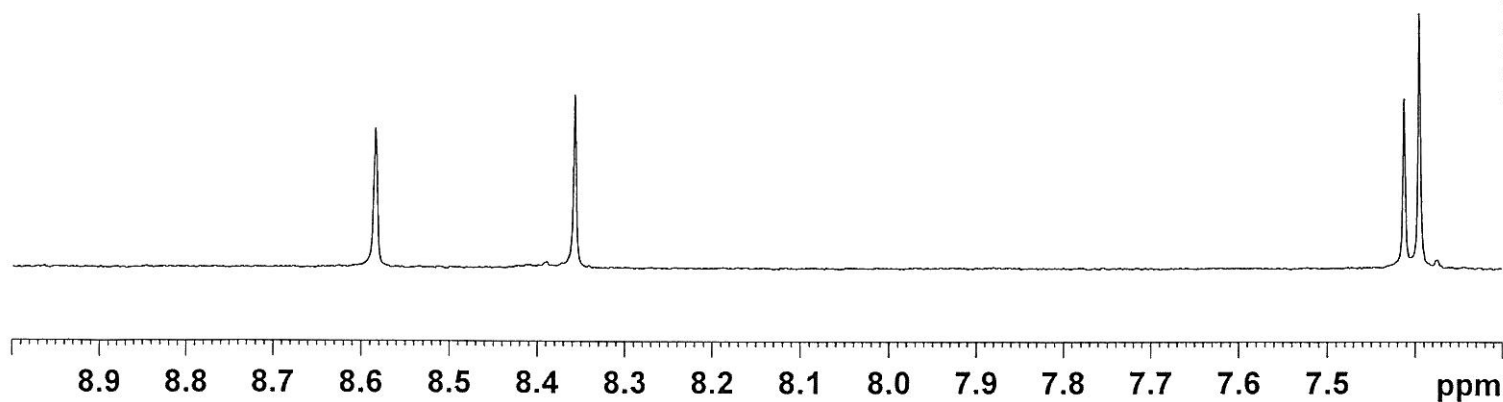

S15. LC-MS trace for Synthetic Aphrocallistin (1).

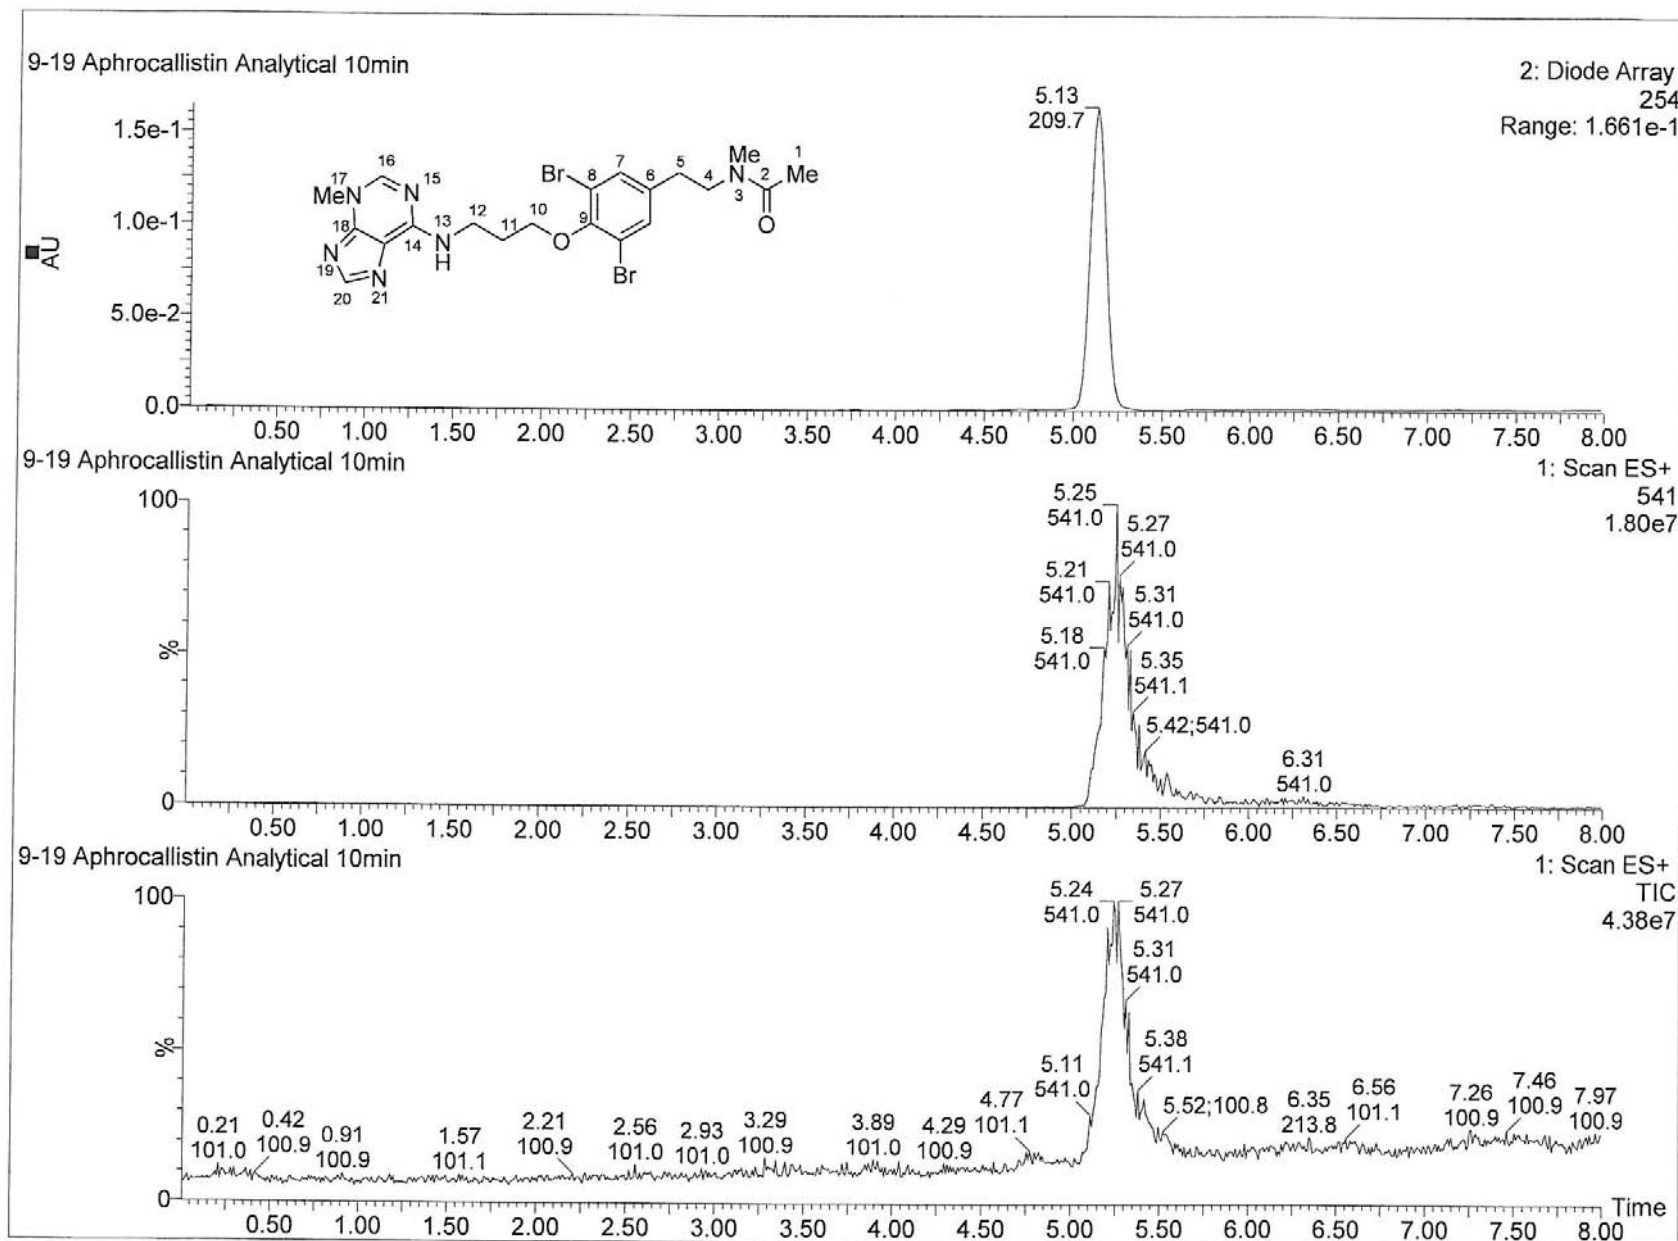

S15. LC-MS trace for Synthetic Aphrocallistin (1).

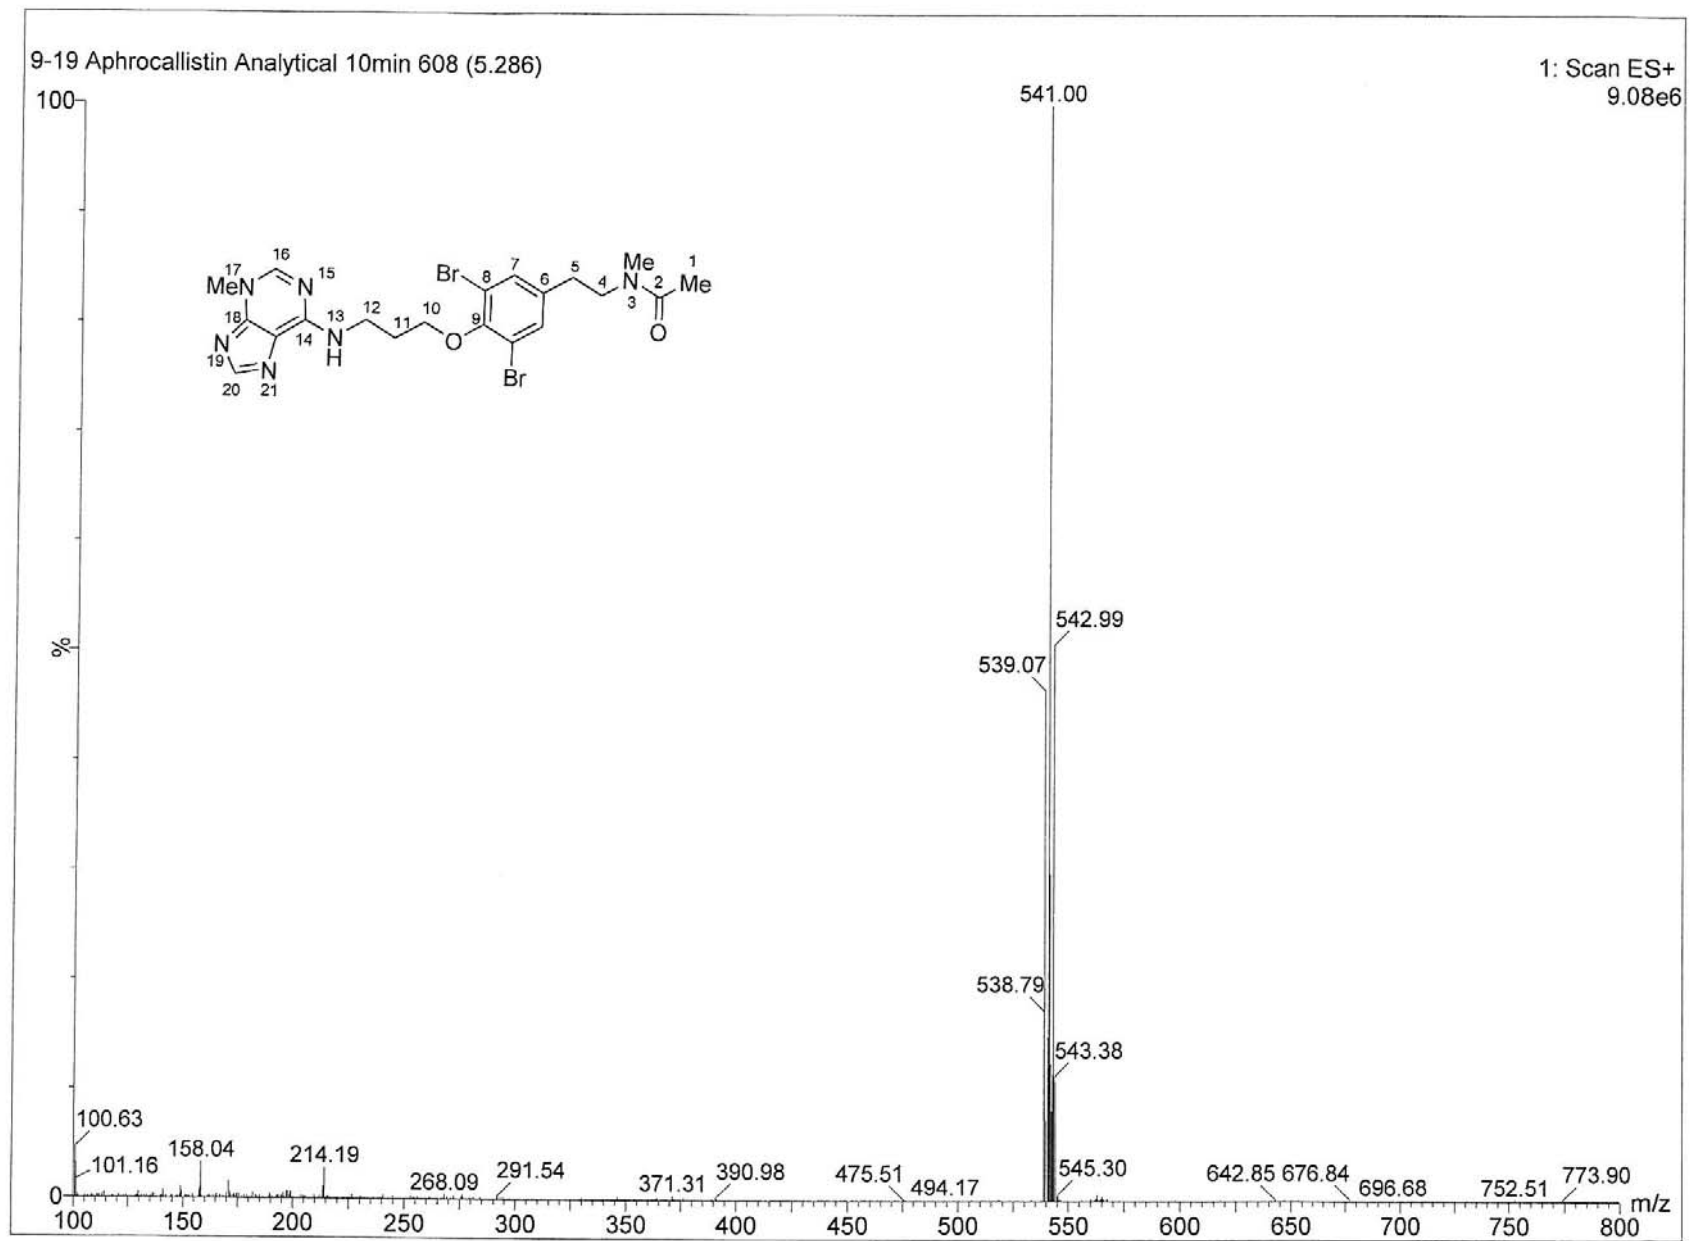

S 16. Details of Preparation of *N*-(4-Methoxyphenethyl)acetamide (**6**)

**Preparation of *N*-(4-Methoxyphenethyl)acetamide (**6**).** Acetyl chloride (3.52 mL, 49.6 mmol, 1.5 equiv) was added dropwise over a 30-min period to a solution of 2-(4-methoxyphenyl)-ethanamine (**5**) (5.00 g, 33.07 mmol) in pyridine (165 ml) at room temperature. The resulting mixture was stirred for 3 h and worked up following the standard procedure to obtain 5.97 g (93%) of the desired product as an off-white solid. The compound was used without further purification:  $^1\text{H}$  NMR (400 MHz,  $\text{CDCl}_3$ )  $\delta$  7.10 (d,  $J = 8.7$  Hz, 2H), 6.84 (d,  $J = 8.7$  Hz, 2H), 5.53 (br s, 1H), 3.79 (s, 3H), 3.47 (q,  $J = 6.9$  Hz, 2H), 2.75 (t,  $J = 6.9$  Hz, 2H), 1.93 (s, 3H).  $^{13}\text{C}$  NMR (100 MHz,  $\text{CDCl}_3$ )  $\delta$  170.1, 158.2, 130.8, 129.68 (two carbons), 114.1 (two carbons), 55.3, 40.9, 34.7, 23.3.
